# Supplementary material for: Enhanced Electrocatalytic Oxygen Reduction Reaction of TiO2 Nanotubes by Combining Surface Oxygen Vacancy Engineering and Zr Doping
Source: MDPI journal article supplement (doi:10.3390/nano14040366), 2024-02-16
Supplement: s1 [file s1]

## Enhanced Electrocatalytic Oxygen Reduction Reaction of TiO<sub>2</sub> Nanotubes by Combining Surface Oxygen Vacancy Engineering and Zr Doping

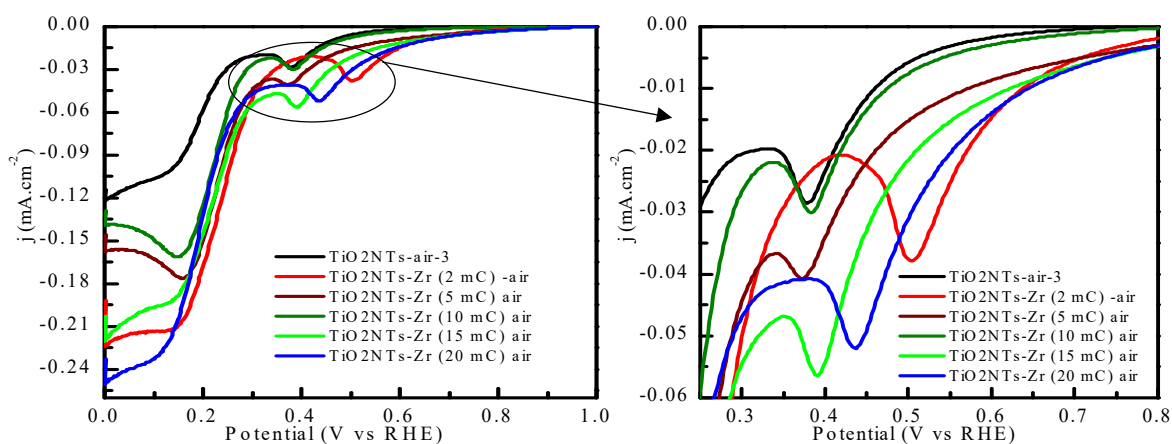

**Figure S1.** LSVs for a TNTs electrode with different ZrO<sub>2</sub> loading (2 to 20 mC) at scan rate 10 mVs<sup>-1</sup> immersed in 1.0 M NaOH and annealed under air
